# Supplementary material
Source: PubMed Central journal article supplement (PMC5620127)
Supplement: NIHMS895310-supplement-Graphic_Abstract.pdf [file NIHMS895310-supplement-Graphic_Abstract.pdf]

**Plasma Clot**  
High production of  
MCP-1, IL-8

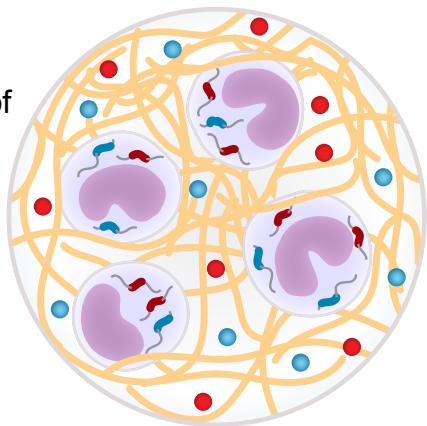

3 - 4  
hours

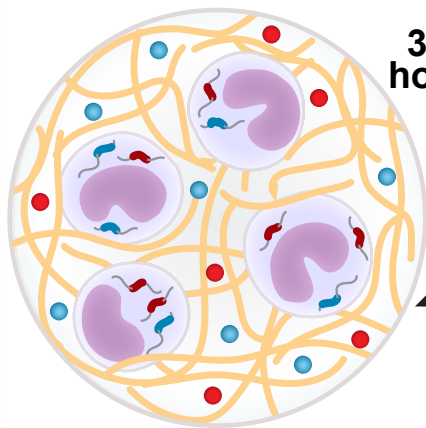

**Delayed Lysis**  
High production of  
MCP-1, IL-8  
continued or slightly decreased

< 2  
hours

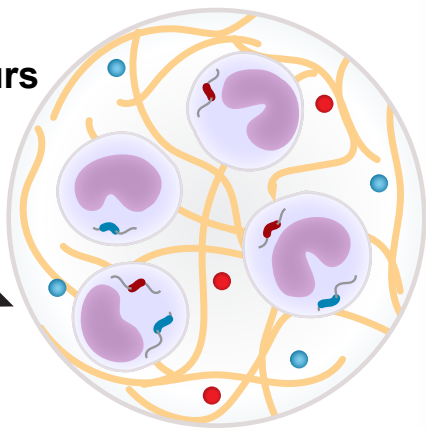

**Rapid Lysis**  
Reduced production of  
MCP-1, IL-8
